# Supplementary material for: Effect of High-frequency (10-kHz) Spinal Cord Stimulation in Patients With Painful Diabetic Neuropathy: A Randomized Clinical Trial
Source: PubMed Central journal article supplement — JAMA Neurol. 2021 Apr 5;78(6):687–98. doi: 10.1001/jamaneurol.2021.0538 (PMC8022268; doi:10.1001/jamaneurol.2021.0538), 2021-04-05
Supplement: jamaneurol-e210538-s003.pdf [file jamaneurol-e210538-s003.pdf]

## Supplemental Online Content

Petersen EA, Stauss TG, Scowcroft JA, et al. Effect of high-frequency (10-kHz) spinal cord stimulation in patients with painful diabetic neuropathy: a randomized clinical trial. *JAMA Neurol.* Published online April 5, 2021. doi:10.1001/jamaneurol.2021.0538

**eTable 1.** Primary end point sensitivity analysis results

**eTable 2.** Pain visual analogue scale scores for patients excluded from the per-protocol population

**eTable 3.** Summary of study-related adverse events

**eTable 4.** Summary of secondary end point analyses

**eTable 5.** Pain visual analogue scale scores for patients who failed temporary trial spinal cord stimulation

**eFigure 1.** Diabetic foot examination

**eFigure 2.** Spinal cord stimulation lead placement

This supplementary material has been provided by the authors to give readers additional information about their work.

**eTable 1.** Primary end point sensitivity analysis results

| Population | Description                           | CMM            | 10 kHz SCS+CMM | p-value  |
|------------|---------------------------------------|----------------|----------------|----------|
| 1          | Per Protocol (PP)                     | 5/94 (5.3%)    | 75/87 (86.2%)  | < 0.0001 |
| 2          | ITT Known Status 10 kHz SCS           | 5/94 (5.3%)    | 75/95 (78.9%)  | < 0.0001 |
| 3          | ITT Worst Case for 10 kHz SCS LTF     | 5/94 (5.3%)    | 75/98 (76.5%)  | < 0.0001 |
| 4          | ITT Worst Case All Missing 10 kHz SCS | 5/94 (5.3%)    | 75/112 (67.0%) | < 0.0001 |
| 5          | ITT Worst 10 kHz SCS/Best CMM Case    | 12/103 (11.7%) | 75/113 (66.4%) | < 0.0001 |

**eTable 1:** Primary endpoint sensitivity analyses. Subjects who did not complete the neurological assessment at 3 months were excluded from primary endpoint analysis of populations 1-4 for CMM (n=2) and populations 1-3 for 10 kHz SCS+CMM (n=1); ITT: intention-to-treat, LTF: lost to follow-up.

**eTable 2.** Pain visual analogue scale scores for patients excluded from the per-protocol population

|                      | Baseline | End of Trial |          | 1 Month  |          | 3 Months |          | 6 Months |          |
|----------------------|----------|--------------|----------|----------|----------|----------|----------|----------|----------|
|                      | VAS (cm) | VAS (cm)     | % Relief | VAS (cm) | % Relief | VAS (cm) | % Relief | VAS (cm) | % Relief |
| CMM Subject 1        | 4.80     | NA           | NA       | Not done | -        | Not done | -        | 1.05     | 78.1     |
| CMM Subject 2        | 8.15     | NA           | NA       | 9.30     | -14.1    | Not done | -        | 9.60     | -17.8    |
| 10 kHz SCS Subject 1 | 5.55     | 0.00         | 100      | 0.15     | 97.3     | Not done | -        | 0.85     | 84.7     |

**eTable 2:** Individual lower limb pain scores and percentage relief from baseline for the subjects excluded from PP population. VAS: visual analog scale.

**eTable 3.** Summary of study-related adverse events

|                                               | CMM<br>n = 103 | 10 kHz SCS + CMM<br>n = 113 |
|-----------------------------------------------|----------------|-----------------------------|
| Total study-related AEs, n (# of subjects, %) | None reported  | 18 (14, 12.4%)              |
| Rated as Serious AEs                          | -              | 2 (2, 1.8%)                 |
| Study-related AEs by type                     |                |                             |
| Infection                                     | -              | 3 (3, 2.7%)                 |
| Wound dehiscence                              | -              | 2 (2, 1.8%)                 |
| Impaired healing                              | -              | 1 (1, 0.9%)                 |
| Device extrusion                              | -              | 1 (1, 0.9%)                 |
| Incision site pain                            | -              | 1 (1, 0.9%)                 |
| IPG site discomfort                           | -              | 1 (1, 0.9%)                 |
| Lead migration                                | -              | 1 (1, 0.9%)                 |
| Contact dermatitis                            | -              | 1 (1, 0.9%)                 |
| Urticaria                                     | -              | 1 (1, 0.9%)                 |
| Radiculopathy                                 | -              | 1 (1, 0.9%)                 |
| Uncomfortable stimulation                     | -              | 1 (1, 0.9%)                 |
| Gastroesophageal reflux                       | -              | 1 (1, 0.9%)                 |
| Myalgia                                       | -              | 1 (1, 0.9%)                 |
| Arthralgia                                    | -              | 1 (1, 0.9%)                 |
| Hyporeflexia                                  | -              | 1 (1, 0.9%)                 |

**eTable 3:** Summary of study-related adverse events (AEs). IPG: implantable pulse generator.

**eTable 4.** Summary of secondary end point analyses

|                                                                                     | CMM                     | 10 kHz SCS + CMM        | Between-Group p-value |
|-------------------------------------------------------------------------------------|-------------------------|-------------------------|-----------------------|
| <b>Per Protocol Population</b>                                                      | <b>n=96<sup>1</sup></b> | <b>n=88<sup>1</sup></b> |                       |
| 1. Lower limb pain VAS ≤3 cm at 3 months, % (n/n)                                   | 5.2%<br>(5/96)          | 78.4%<br>(69/88)        | < 0.001 <sup>2</sup>  |
| 2. Subjects crossing over at 6 months, % (n/n)                                      | 81.7%<br>(76/93)        | 0.0%<br>(0/87)          | < 0.001 <sup>2</sup>  |
| 3. Lower limb pain relief ≥50% at 6 months, % (n/n)                                 | 5.4%<br>(5/93)          | 85.1%<br>(74/87)        | < 0.001 <sup>2</sup>  |
| 4. Remitters <sup>3</sup> at 6 months, % (n/n)                                      | 1.1%<br>(1/95)          | 60.2%<br>(53/88)        | < 0.001 <sup>2</sup>  |
| 5. Overall improvement in neurological assessment <sup>4</sup> at 3 months, % (n/n) | 6.4%<br>(6/94)          | 72.4%<br>(63/87)        | < 0.001 <sup>2</sup>  |
| 6. Overall improvement in neurological assessment <sup>4</sup> at 6 months, % (n/n) | 3.3%<br>(3/92)          | 61.9%<br>(52/84)        | < 0.001 <sup>2</sup>  |
| 7. Changes in health-related quality of life at 6 months                            |                         |                         |                       |
| EQ-5D-5L index, mean ± SD                                                           | -0.031 ± 0.127          | 0.130 ± 0.159           | < 0.001 <sup>5</sup>  |
| EQ-5D-5L health VAS, mean ± SD                                                      | -1.7 ± 23.0             | 15.9 ± 21.6             | < 0.001 <sup>5</sup>  |
| 8. Percentage change in HbA1c at 6 months, mean ± SD                                | 2.6% ± 15.4%            | 1.5% ± 14.9%            | 0.649 <sup>5</sup>    |

<sup>1</sup> The n for each assessment may vary due to missing data  
<sup>2</sup> By Fisher's Exact test, 2-sided  
<sup>3</sup> Remission is defined as pain VAS score ≤3 cm for 6 consecutive months  
<sup>4</sup> Overall improvement on neurological assessment defined as no deficit compared to baseline in any motor, sensory, or reflex outcomes and improvement in at least one outcome  
<sup>5</sup> Student's t-test, 2-sided

**eTable 4:** Summary of all prespecified secondary endpoints shown in order of hierarchical closed-testing procedure. There were statistically significant differences between the groups in the first 7 of 8 secondary endpoints. VAS: visual analog scale, cm: centimeter.

**eTable 5.** Pain visual analogue scale scores for patients who failed temporary trial spinal cord stimulation

|           | Baseline | End of Trial |          | 1 Month CMM |          | 3 Months CMM |          | 6 Months CMM |          |
|-----------|----------|--------------|----------|-------------|----------|--------------|----------|--------------|----------|
|           | VAS (cm) | VAS (cm)     | % Relief | VAS (cm)    | % Relief | VAS (cm)     | % Relief | VAS (cm)     | % Relief |
| Subject 1 | 6.75     | 6.10         | 9.6      | 3.75        | 44.4     | Not done     | -        | Not done     | -        |
| Subject 2 | 9.30     | 4.95         | 46.8     | 4.15        | 55.4     | 3.40         | 63.4     | 6.25         | 32.8     |
| Subject 3 | 6.65     | 4.85         | 27.1     | Not done    | -        | 3.95         | 40.6     | 5.30         | 20.3     |
| Subject 4 | 7.30     | 5.20         | 28.9     | 8.55        | -17.1    | 5.85         | 19.9     | 6.45         | 11.6     |
| Subject 5 | 8.05     | 7.75         | 3.7      | Not done    | -        | Not done     | -        | Not done     | -        |
| Subject 6 | 9.65     | 8.45         | 12.4     | 8.15        | 15.5     | 8.65         | 10.4     | 8.70         | 9.8      |

**eTable 5:** Individual lower limb pain scores and percentage relief from baseline for the trial failure subjects treated with CMM. VAS: visual analog scale.

**eFigure 1.** Diabetic foot examination

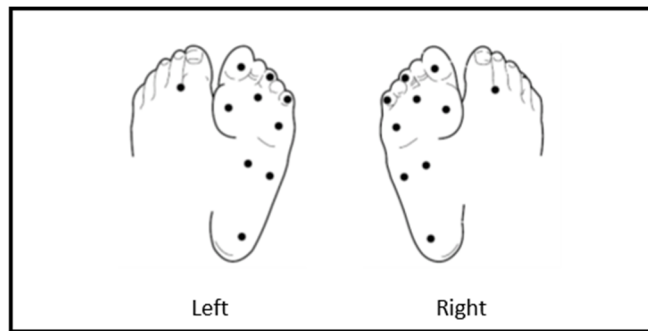

**eFigure 1:** Standardized test sites on the feet for 10-g monofilament & pinprick sensory examination. Outcome options for each test site include: hypersensitive, normal, diminished, or absent.

**eFigure 2.** Spinal cord stimulation lead placement

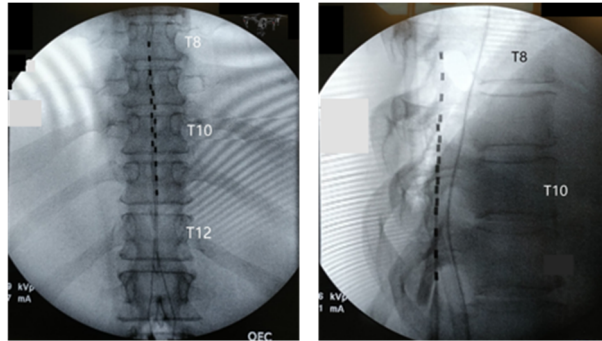

**eFigure 2:** Typical placement of stimulation electrodes along midline T8-T11 vertebral levels shown in anterior-posterior (left) and lateral (right) x-rays.
