# Supplementary material for: Effect of High-frequency (10-kHz) Spinal Cord Stimulation in Patients With Painful Diabetic Neuropathy: A Randomized Clinical Trial
Source: PubMed Central journal article supplement — JAMA Neurol. 2021 Apr 5;78(6):687–98. doi: 10.1001/jamaneurol.2021.0538 (PMC8022268; doi:10.1001/jamaneurol.2021.0538), 2021-04-05
Supplement: jamaneurol-e210538-s004.pdf [file jamaneurol-e210538-s004.pdf]

## **Data Sharing Statement**

Petersen. Effect of High-Frequency (10-kHz) Spinal Cord Stimulation in Patients With Painful Diabetic Neuropathy. *JAMA Neurol.* Published April 05, 2021. doi:10.1001/jamaneurol.2021.0538

### **Data**

**Data available:** No
